# Supplementary material for: Reprogramming the sulfur recycling network to improve l-cysteine production in Corynebacterium glutamicum
Source: Royal Society of Chemistry journal article supplement (doi:10.1039/d3gc00027c), 2023-01-01
Supplement: d3gc00027c1.pdf [file d3gc00027c1.pdf]

Reprogramming the sulfur recycling network to improve L-cysteine production in  
*Corynebacterium glutamicum*

Huanmin Du<sup>1,2,3</sup>, Jinfang Qiao<sup>4</sup>, Yuting Qi<sup>5</sup>, Lingcong Li<sup>1,2,3</sup>, Ning Xu<sup>1,2</sup>, Li Shao<sup>5</sup>,  
Liang Wei<sup>1,2\*</sup>, Jun Liu<sup>1,2\*</sup>

1. Tianjin Institute of Industrial Biotechnology, Chinese Academy of Sciences, Tianjin 300308, China.
2. Key Laboratory of Systems Microbial Biotechnology, Chinese Academy of Sciences, Tianjin 300308, China.
3. University of Chinese Academy of Sciences, Beijing 100049, China.
4. College of Biotechnology, Tianjin University of Science and Technology, Tianjin 300457, China
5. Department of Microbiology and Biotechnology, College of Life Sciences, Northeast Agricultural University, No. 600 Changjiang Road, Xiangfang District, Harbin 150030, China.

\*To whom correspondence should be addressed:

Jun Liu; E-mail: liu\_jun@tib.cas.cn.

Liang Wei; E-mail: weil@tib.cas.cn.

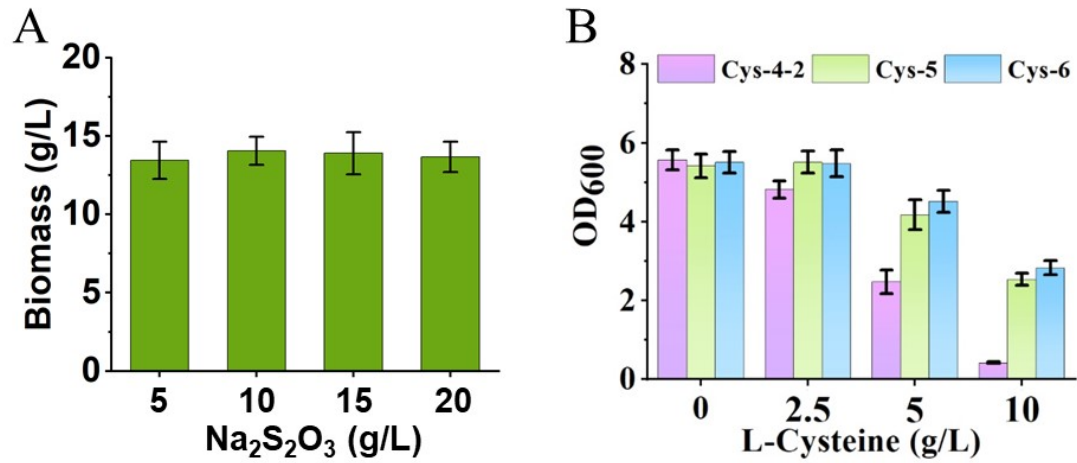

Fig. S1 (A) Measurement of the biomass of the engineered strain Cys-4-2 cultivated with different concentrations of Na<sub>2</sub>S<sub>2</sub>O<sub>3</sub>. (B) Determination of the L-cysteine tolerance of the engineered strains. All data were the average of three independent experiments with standard deviations. Cys-4-2, Cys-4-1, *poxB* :: P<sub>H7</sub>-*cysK*<sup>Ec</sup>; Cys-5, Cys-4, *ldh* :: P<sub>H7</sub>-*eamA*<sup>Ec</sup>; Cys-6, Cys-5,  $\Delta$  *NCgl2463*.

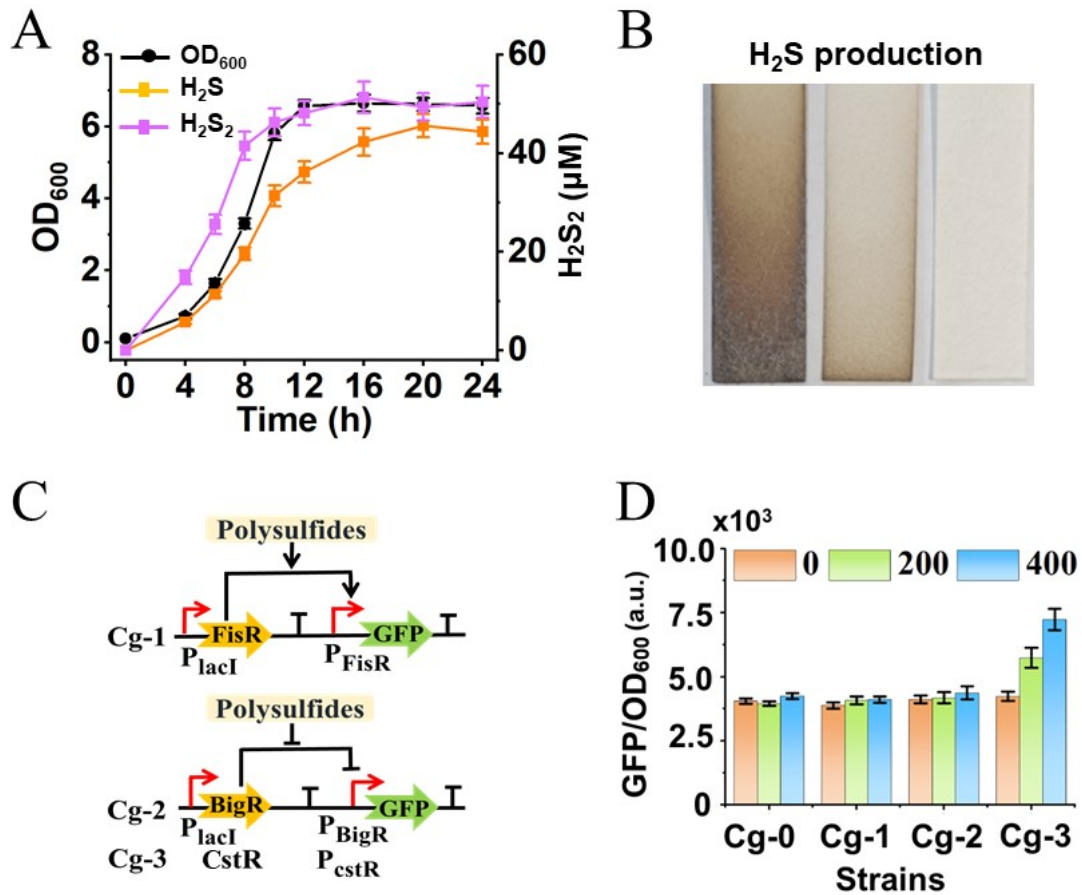

Fig. S2 Screening the H<sub>2</sub>S<sub>2</sub>-responsive transcription factor for the construction of genetic circuit in *C. glutamicum*. Determination of cell growth, intracellular H<sub>2</sub>S and H<sub>2</sub>S<sub>2</sub> levels (A) and the escaped H<sub>2</sub>S (B) in *C. glutamicum* WT. (C) Schematic representation of testing plasmids containing FisR, CstR, and BigR. (D) Investigation of the function of three reporting systems in *C. glutamicum*. All data were the average of three independent experiments with standard deviations. Cg-0, *C. glutamicum* WT, containing pXMJ20; Cg-1, *C. glutamicum* WT, containing pFisR-P<sub>lac</sub>-GFP; Cg-2, *C. glutamicum* WT, containing pBigR-P<sub>lac</sub>-GFP; Cg-3, *C. glutamicum* WT, containing pcstR-P<sub>lac</sub>-GFP.

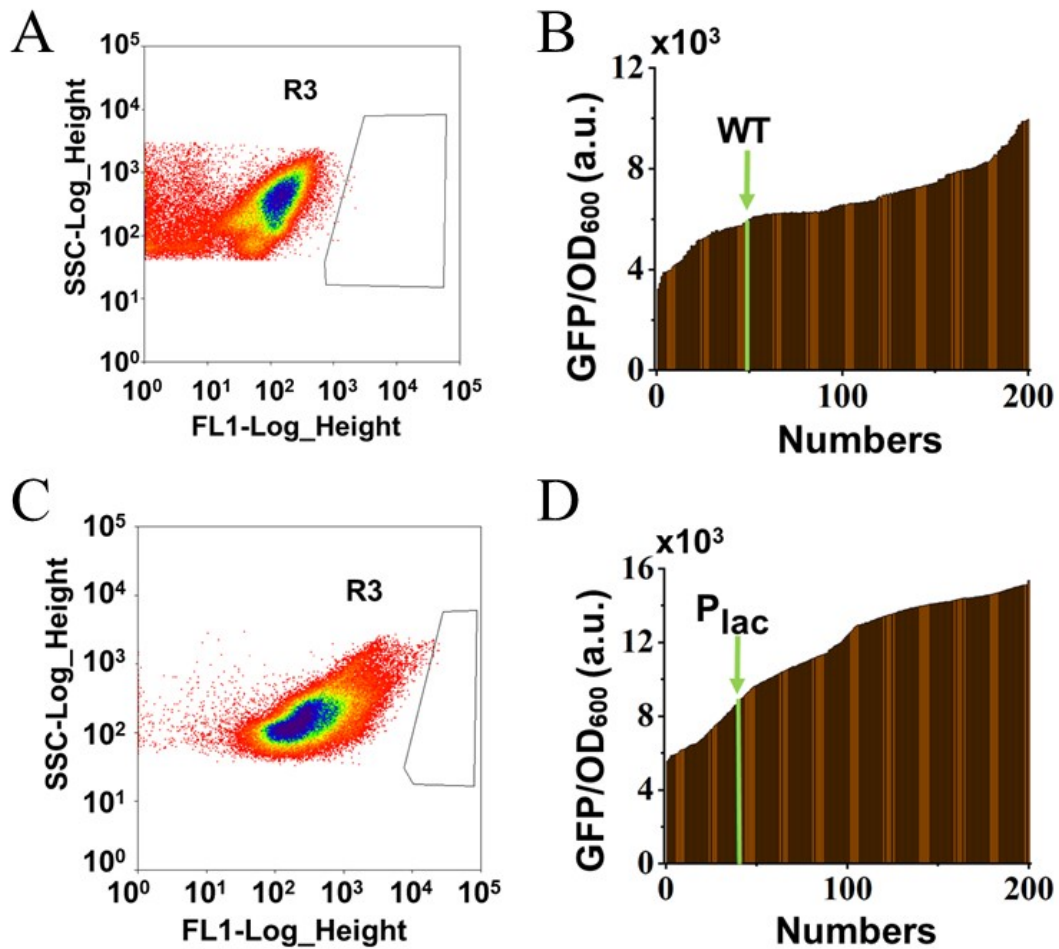

Fig. S3 Optimization of the  $H_2S_2$ -responsive genetic circuit in *C. glutamicum*. (A) FACS screening of the CstR variants. The black pentagon refers to the top 0.01% of all screened cells. (B) 96-well plate screening. The strains were screened using FACS, the wide-type CstR was used as the control, and the sorted strains were cultivated in 96-well plates. The fluorescence intensities were further analyzed by using a synergy neo2 multimode microplate reader. (C) FACS screening of the promoter library. The black pentagon refers to the top 0.01% of all screened cells. (D) 96-well plate screening. The strains were screened using FACS, the  $P_{lac}$  strain was used as the control, and the sorted strains were cultivated in 96-well plates. The fluorescence intensities were further analyzed by using a synergy neo2 multimode microplate reader.

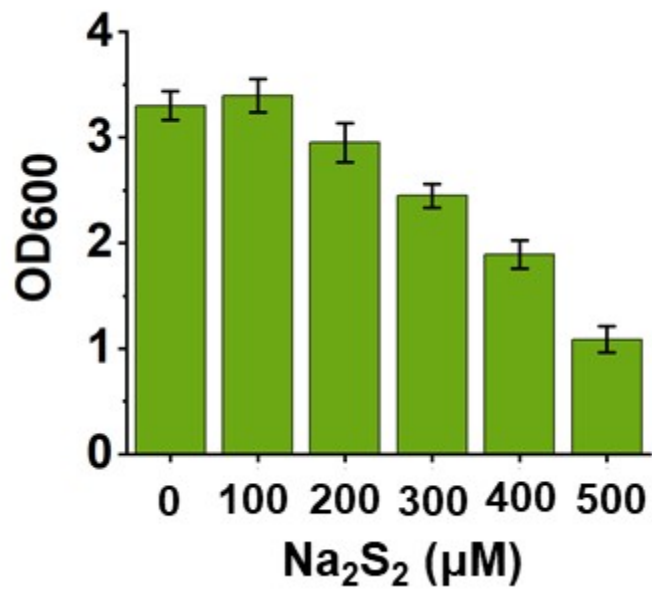

Fig. S4 Effects of different concentrations of Na<sub>2</sub>S<sub>2</sub> on the biomass of *C. glutamicum* WT. All data were the average of three independent experiments with standard deviations.

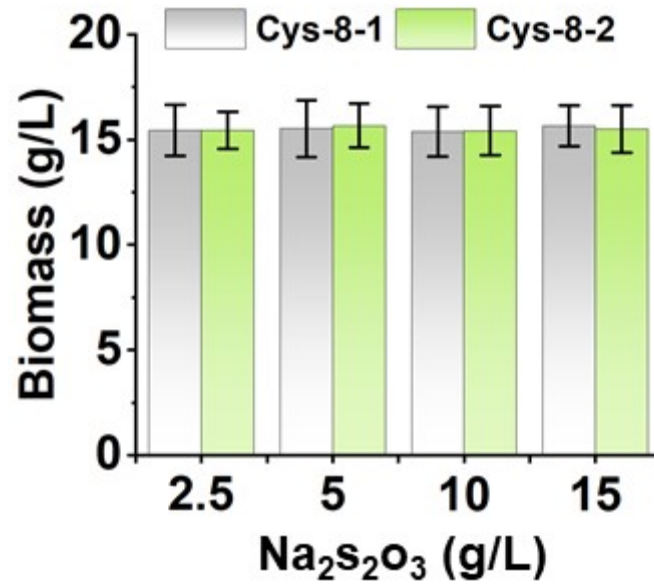

Fig. S5 Effects of different concentration of Na<sub>2</sub>S<sub>2</sub>O<sub>3</sub> on the biomass of BSGC and non BSGC strains. All data were the average of three independent experiments with standard deviations. Cys-8-1, Cys-6, containing pEC-mCh4 and pXMJ20; Cys-8-2, Cys-7, containing pEC-mCh4 and PcstR-cstB.

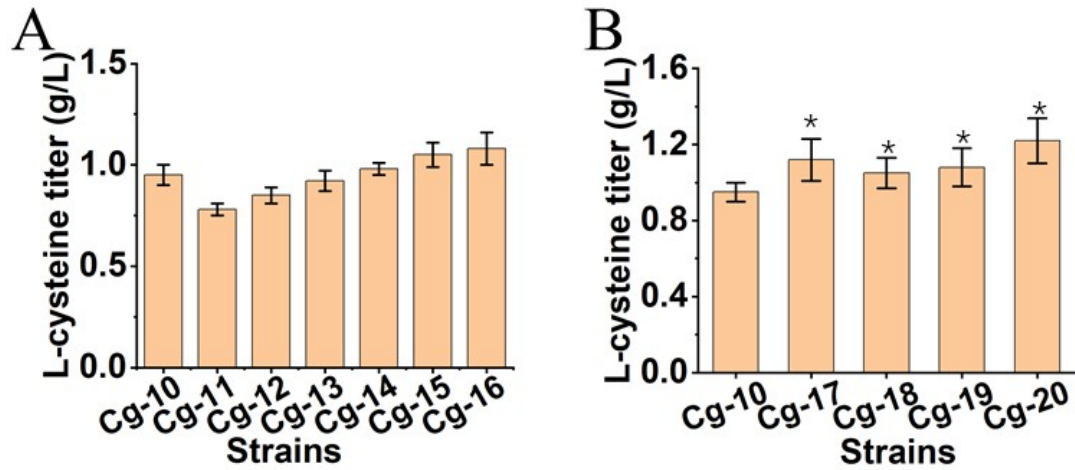

Fig. S6 Effects of the key genes of H<sub>2</sub>S utilization and transportation module on L-cysteine production in *C. glutamicum*. (A) Determination of the role of different glutaredoxin and thioredoxin in L-cysteine production. (B) Measurement of the production of L-cysteine in different strains with overexpressing the H<sub>2</sub>S utilization (thioredoxin, *cysM*, *cysK*) and transport module (*bcr*), respectively. All data were the average of three independent experiments with standard deviations. The \* indicated the significant differences of  $P \leq 0.01$  relative to the control. Cg-10, Cys-6 containing pXMJ20; Cg-11, Cys-6 containing pXMJ-cg0964; Cg-12, Cys-6 containing pXMJ-cg1244; Cg-13, Cys-6 containing pXMJ-cg2789; Cg-14, Cys-6 containing pXMJ-cg3299; Cg-15, Cys-6 containing pXMJ-cg3422; Cg-16, Cys-6 containing pXMJ-cg3423; Cg-17, Cys-6 containing pXMJ-Trx; Cg-18, Cys-6 containing pXMJ-cysM; Cg-19, Cys-6 containing pXMJ-cysK; Cg-20, Cys-6 containing pXMJ-bcr.

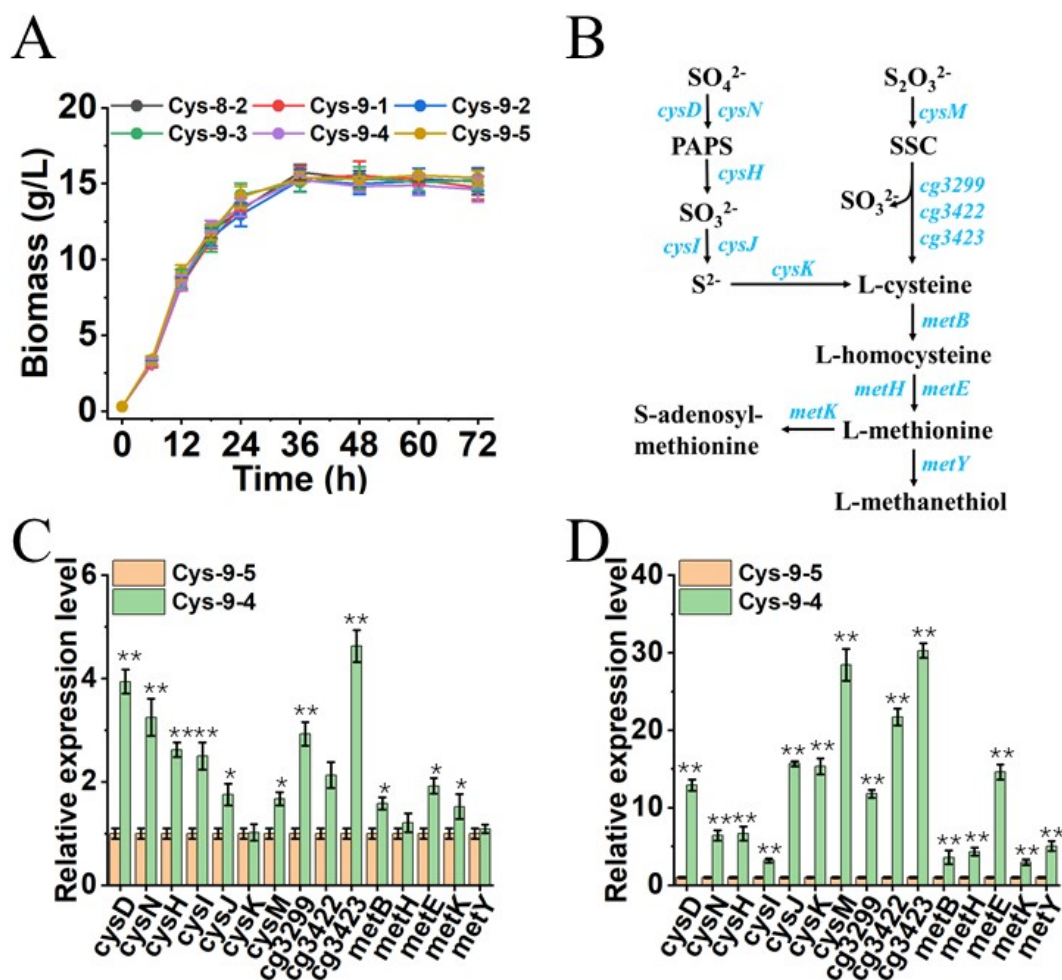

Fig. S7 (A) Determination of the cell growth in the L-cysteine biosynthetic network rewired strains. (B) The Schematic diagram of sulfur cycling network, including L-homocysteine, L-methionine, S-Adenosyl-L-methionine, Methanethiol pathways and sulfur assimilation pathway. (C and D) Measurement of the transcription levels of the key genes in L-homocysteine (*metB*), L-methionine (*metH* and *metE*), S-adenosyl-L-methionine (*metK*), methanethiol (*metY*) pathways and sulfur assimilation pathway (*cysD*, *cysN*, *cysH*, *cysI*, *cysJ*, *cysK*, *cysM*, *cg3299*, *cg3422* and *cg3423*) in the BSGC strain Cys-9-4 when cultivated at 24 h and 72 h, respectively. The static regulation strain Cys-9-5 was used as the control. All data were the average of three independent experiments with standard deviations. The \* and \*\* indicated the significant differences of  $P \leq 0.05$  and  $P \leq 0.01$ , respectively. cystathionine  $\gamma$ -synthase, *metB*; homocysteine methyltransferase, *metH* and *metE*; S-adenosylmethionine synthetase, *metK*; O-acetylhomoserine (thiol)-lyase, *metY*; sulfate adenytransferase subunit 1,2, *cysD* and



*cysN*; phosphoadenosine-phosphosulfate reductase, *cysH*; sulfite reductase, *cysI* and *cysJ*; cysteine synthase A, *cysK*; cysteine synthase B, *cysM*; thioredoxin-related genes, *cg3299*, *cg3422* and *cg3423*. Cys-8-2, Cys-7, containing pEC-mCh4 and P<sub>cstR</sub>-cstB; Cys-9-1, Cys-7, containing pEC-mCh4 and pXMJ-cstR-cysK; Cys-9-2, Cys-7, containing pEC-cys1 and pXMJ-cstR-cysK; Cys-9-3, Cys-7, containing pEC-cys1 and pXMJ-cstR-cys; Cys-9-4, Cys-7, containing pEC-cys2 and pXMJ-cstR-cys; Cys-9-5, Cys-6, containing pEC-mCh4 and pXMJ-cys-C.

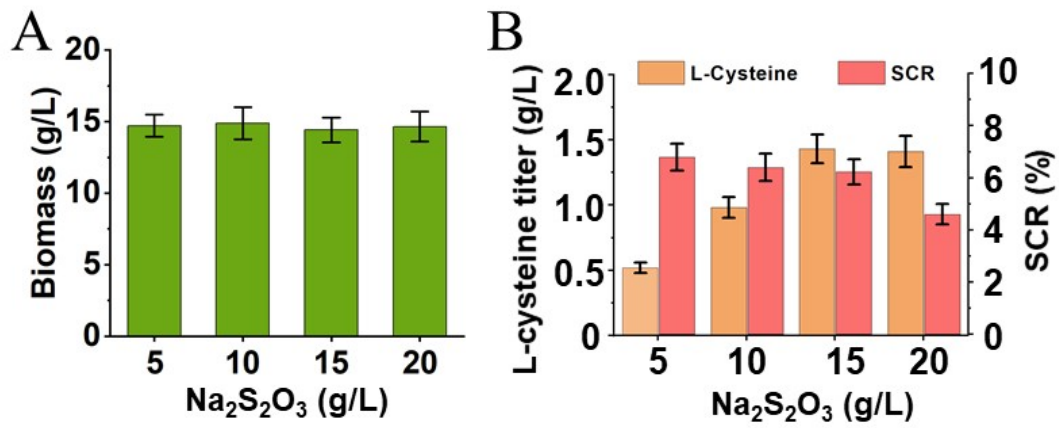

Fig. S8 Measurement of fermentation profiles in the static regulation strain Cys-9-5. Determination of biomass (A), L-cysteine production and SCR (B) under 5-20 g/L  $\text{Na}_2\text{S}_2\text{O}_3$  supply. All data were the average of three independent experiments with standard deviations. Cys-9-5, Cys-6, containing pEC-mCh4 and pXMJ-cys-C

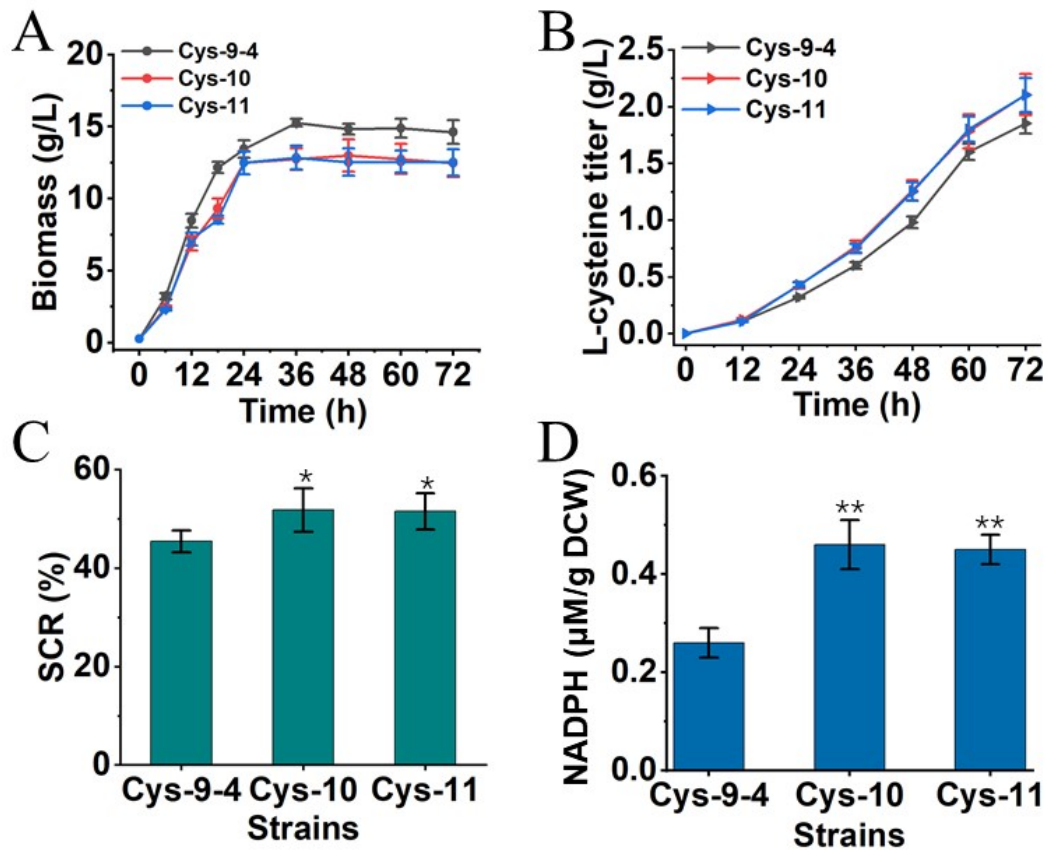

Fig. S9 Enhancing NADPH pool to promote L-cysteine production. Measurement of cell growth (A), L-cysteine production (B), SCR (C) and intracellular NADPH (D) in the NADPH-enhanced strains. All data were the average of three independent experiments with standard deviations. The \* and \*\* indicated the significant differences of  $P \leq 0.05$  and  $P \leq 0.01$ , respectively. Cys-9-4, Cys-7, containing pEC-cys2 and pXMI-cstR-cys; Cys-10, Cys-9-4,  $P_{zwf} :: P_{H7}$ ; Cys-11,  $pck :: P_{H7-pntAB}$

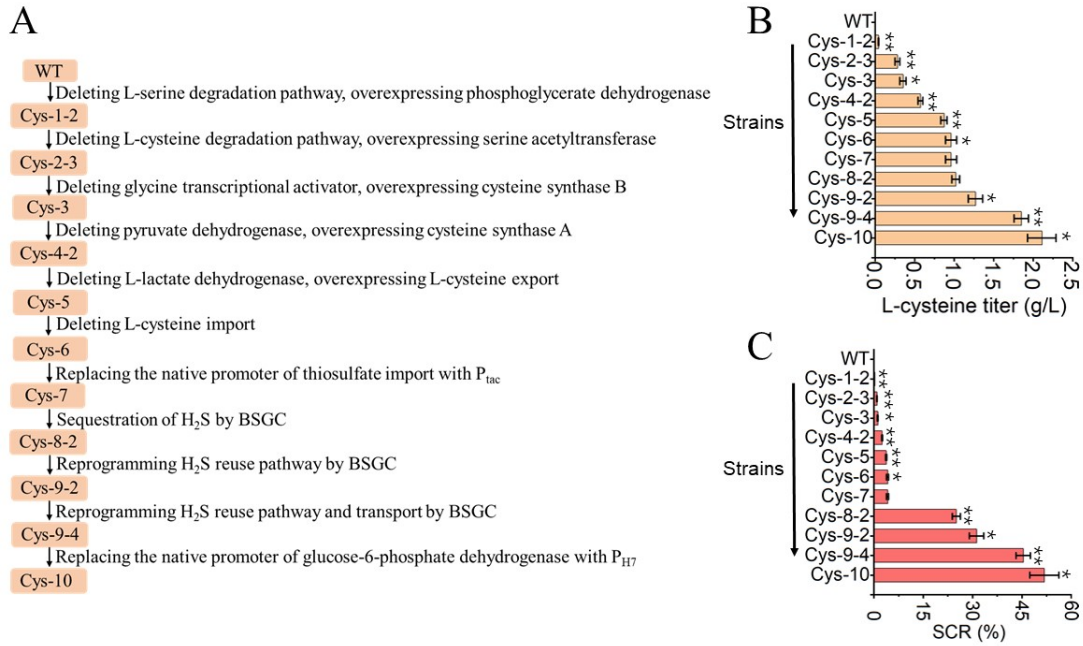

Fig. S10 (A) Flow chart of constructing an L-cysteine-producing strain in *C. glutamicum*. Determination of the L-cysteine production (B) and SCR (C) of the engineered strains in each step. All data were the average of three independent experiments with standard deviations. The \* and \*\* indicated the significant differences of  $P \leq 0.05$  and  $P \leq 0.01$ , respectively. WT, *C. glutamicum* WT; Cys-1-2, Cys-1-1, *sdaA* :: P<sub>H7</sub>-*serA*<sup>Δ197AA</sup>; Cys-2-3, Cys-2-1, *aecD* :: P<sub>H7</sub>-*cysE*(M201R)-*cysE*(M201R); Cys-3, Cys-2-3, *glyR* :: P<sub>H7</sub>-*cysM*<sup>Ec</sup>; Cys-4-2, Cys-4-1, *poxB* :: P<sub>H7</sub>-*cysK*<sup>Ec</sup>; Cys-5, Cys-4, *ldh* :: P<sub>H7</sub>-*eamA*<sup>Ec</sup>; Cys-6, Cys-5, Δ *NCgl2463*; Cys-7, Cys-6, P<sub>cysU</sub> :: P<sub>tac</sub>; Cys-8-2, Cys-7, containing pEC-mCh4 and PcstR-cstB; Cys-9-2, Cys-7, containing pEC-cys1 and pXMJ-cstR-cysK; Cys-9-4, Cys-7, containing pEC-cys2 and pXMJ-cstR-cys; Cys-10, Cys-9-4, P<sub>zwf</sub> :: P<sub>H7</sub>.

Table S1 Characteristics of strains used in this study

| Strains                                            | Characteristics                                                                                  | Source           |
|----------------------------------------------------|--------------------------------------------------------------------------------------------------|------------------|
| <i>E. coli</i> DH5 $\alpha$                        | Host for plasmids construction                                                                   | Invitrogen       |
| <i>E. coli</i> MG1655                              | Host for genes cloning                                                                           | Laboratory stock |
| <i>C. glutamicum</i> WT                            | Wild-type, the parent strain                                                                     | Laboratory stock |
| Cys-1-1                                            | <i>C. glutamicum</i> WT, P <sub>serA</sub> :: P <sub>H7</sub>                                    | This study       |
| Cys-1-2                                            | Cys-1-1, <i>sdaA</i> :: P <sub>H7</sub> - <i>serA</i> $\Delta$ 197AA                             | This study       |
| Cys-1-3                                            | Cys-1-1, <i>sdaA</i> :: P <sub>H7</sub> - <i>serA</i> $\Delta$ 197AA- <i>serA</i> $\Delta$ 197AA | This study       |
| Cys-2-1                                            | Cys-1-2, P <sub>cysE</sub> :: P <sub>H7</sub>                                                    | This study       |
| Cys-2-2                                            | Cys-2-1, <i>aecD</i> :: P <sub>H7</sub> - <i>cysE</i> (M201R)                                    | This study       |
| Cys-2-3                                            | Cys-2-1, <i>aecD</i> :: P <sub>H7</sub> - <i>cysE</i> (M201R)- <i>cysE</i> (M201R)               | This study       |
| Cys-2-4                                            | Cys-2-3, <i>glyR</i> :: P <sub>H7</sub> - <i>cysE</i> (M201R)                                    | This study       |
| Cys-3                                              | Cys-2-3, <i>glyR</i> :: P <sub>H7</sub> - <i>cysM</i> <sup>Ec</sup>                              | This study       |
| Cys-4-1                                            | Cys-3, P <sub>cysK</sub> :: P <sub>H7</sub>                                                      | This study       |
| Cys-4-2                                            | Cys-4-1, <i>poxB</i> :: P <sub>H7</sub> - <i>cysK</i> <sup>Ec</sup>                              | This study       |
| Cys-4-3                                            | Cys-4-1, <i>poxB</i> :: P <sub>H7</sub> - <i>cysK</i> <sup>Ec</sup> - <i>cysK</i> <sup>Ec</sup>  | This study       |
| Cys-5                                              | Cys-4-2, <i>ldh</i> :: P <sub>H7</sub> - <i>eamA</i> <sup>Ec</sup>                               | This study       |
| Cys-6                                              | Cys-5, $\Delta$ <i>NCgl2463</i>                                                                  | This study       |
| Cys-7                                              | Cys-6, P <sub>cysU</sub> :: P <sub>tac</sub>                                                     | This study       |
| Cys-8-1                                            | Cys-6, containing pEC-mCh4 and pXMJ20                                                            | This study       |
| Cys-8-2                                            | Cys-7, containing pEC-mCh4 and PcstR-cstB                                                        | This study       |
| Cys-9-1                                            | Cys-7, containing pEC-mCh4 and pXMJ-cstR-cysK                                                    | This study       |
| Cys-9-2                                            | Cys-7, containing pEC-cys1 and pXMJ-cstR-cysK                                                    | This study       |
| Cys-9-3                                            | Cys-7, containing pEC-cys1 and pXMJ-cstR-cys                                                     | This study       |
| Cys-9-4                                            | Cys-7, containing pEC-cys2 and pXMJ-cstR-cys                                                     | This study       |
| Cys-9-5                                            | Cys-6, containing pEC-mCh4 and pXMJ-cys-C                                                        | This study       |
| Cys-10                                             | Cys-9-4, P <sub>zwf</sub> :: P <sub>H7</sub>                                                     | This study       |
| Cys-11                                             | Cys-9-4, <i>pck</i> :: P <sub>H7</sub> - <i>pntAB</i> <sup>Ec</sup>                              | This study       |
| Strains used to verify gene function in this study |                                                                                                  |                  |
| Cg-0                                               | <i>C. glutamicum</i> WT, containing pXMJ20                                                       | This study       |
| Cg-1                                               | <i>C. glutamicum</i> WT, containing pFisR-P <sub>lac</sub> -GFP                                  | This study       |
| Cg-2                                               | <i>C. glutamicum</i> WT, containing pBigR-P <sub>lac</sub> -GFP                                  | This study       |
| Cg-3                                               | <i>C. glutamicum</i> WT, containing pestR-P <sub>lac</sub> -GFP                                  | This study       |
| Cg-4                                               | <i>C. glutamicum</i> WT, containing pXMJ-sqr <sup>Cp</sup>                                       | This study       |
| Cg-5                                               | <i>C. glutamicum</i> WT, containing pXMJ-sqr <sup>Ss</sup>                                       | This study       |
| Cg-6                                               | <i>C. glutamicum</i> WT, containing pXMJ-cstA                                                    | This study       |
| Cg-7                                               | <i>C. glutamicum</i> WT, containing pXMJ-cstB                                                    | This study       |

|       |                                                            |            |
|-------|------------------------------------------------------------|------------|
| Cg-8  | <i>C. glutamicum</i> WT, containing pXMJ-pdo               | This study |
| Cg-9  | <i>C. glutamicum</i> WT, containing PectR-sqr and pEC-mCh4 | This study |
| Cg-10 | Cys-6 containing pXMJ20                                    | This study |
| Cg-11 | Cys-6 containing pXMJ-cg0964                               | This study |
| Cg-12 | Cys-6 containing pXMJ-cg1244                               | This study |
| Cg-13 | Cys-6 containing pXMJ-cg2789                               | This study |
| Cg-14 | Cys-6 containing pXMJ-cg3299                               | This study |
| Cg-15 | Cys-6 containing pXMJ-cg3422                               | This study |
| Cg-16 | Cys-6 containing pXMJ-cg3423                               | This study |
| Cg-17 | Cys-6 containing pXMJ-Trx                                  | This study |
| Cg-18 | Cys-6 containing pXMJ-cysM                                 | This study |
| Cg-19 | Cys-6 containing pXMJ-cysK                                 | This study |
| Cg-20 | Cys-6 containing pXMJ-bcr                                  | This study |

---

*Ec: Escherichia coli*

*Sa: Staphylococcus aureus*

*Cp: Cupriavidus pinatubonensis* JMP134

*Ss: Synechococcus* sp. strain PCC7002

Table S2 Plasmids used in this study

| Plasmids                             | Relevant characteristics                                                                                | Sources    |
|--------------------------------------|---------------------------------------------------------------------------------------------------------|------------|
| pCRD206                              |                                                                                                         | (32)       |
| pCRD206                              | <i>Kan<sup>R</sup></i> , gene deletion plasmid                                                          |            |
| pCRD-P <sub>H7</sub> -serA           | pCRD206 derivate, replacing native promoter of <i>serA</i> by the promoter P <sub>H7</sub>              | This study |
| pCRD-sdaA-P <sub>H7</sub> -serA      | pCRD206 derivate, deleting <i>sdaA</i> gene , overexpressing <i>serA</i> <sup>Δ197AA</sup>              | This study |
| pCRD-sdaA-P <sub>H7</sub> -serA-serA | pCRD206 derivate, deleting <i>sdaA</i> gene, overexpressing two copies of <i>serA</i> <sup>Δ197AA</sup> | This study |
| pCRD-P <sub>H7</sub> -cysE           | pCRD206 derivate, replacing native promoter of <i>cysE</i> by the promoter P <sub>H7</sub>              | This study |
| pCRD-aecD-P <sub>H7</sub> -cysE      | pCRD206 derivate, deleting <i>aecD</i> gene , overexpressing <i>cysE</i> (M201R)                        | This study |
| pCRD-aecD-P <sub>H7</sub> -cysE-cysE | pCRD206 derivate, deleting <i>sdaA</i> gene, overexpressing two copies of <i>cysE</i> (M201R)           | This study |
| pCRD-glyR-P <sub>H7</sub> -cysE      | pCRD206 derivate, deleting <i>sdaA</i> gene, overexpressing <i>cysE</i> (M201R)                         | This study |
| pCRD-glyR-P <sub>H7</sub> -cysM      | pCRD206 derivate, deleting <i>glyR</i> gene , overexpressing <i>cysM</i> <sup>Ec</sup>                  | This study |
| pCRD-P <sub>H7</sub> -cysK           | pCRD206 derivate, replacing native promoter of <i>cysK</i> by the promoter P <sub>H7</sub>              | This study |
| pCRD-poxB-P <sub>H7</sub> -cysK      | pCRD206 derivate, deleting <i>poxB</i> gene , overexpressing <i>cysK</i> <sup>Ec</sup>                  | This study |
| pCRD-poxB-P <sub>H7</sub> -cysK-cysK | pCRD206 derivate, deleting <i>poxB</i> gene , overexpressing two copies of <i>cysK</i> <sup>Ec</sup>    | This study |
| pCRD-ldh-P <sub>H7</sub> -eamA       | pCRD206 derivate, deleting <i>ldh</i> gene , overexpressing <i>eamA</i> <sup>Ec</sup>                   | This study |
| pCRD-NCgl2463                        | pCRD206 derivate, deleting <i>NCgl2463</i> gene                                                         | This study |
| pCRD-P <sub>tac</sub> -cysU          | pCRD206 derivate, replacing native promoter of <i>cysU</i> by the promoter P <sub>tac</sub>             | This study |
| pCRD-P <sub>H7</sub> -zwf            | pCRD206 derivate, replacing native promoter of <i>zwf</i> by the promoter P <sub>H7</sub>               | This study |
| pCRD-pck-P <sub>H7</sub> -pntAB      | pCRD206 derivate, deleting <i>pck</i> gene , overexpressing <i>pntAB</i> <sup>Ec</sup>                  | This study |
| pXMJ19                               |                                                                                                         |            |
| pXMJ19                               | <i>Cm<sup>R</sup></i> , <i>C. glutamicum</i> - <i>E. coli</i> shuttle vector                            | Invitrogen |

|                                      |                                                                                                              |            |
|--------------------------------------|--------------------------------------------------------------------------------------------------------------|------------|
| pXMJ20                               | pXMJ19 derivate, removing <i>Bsal</i> (33)<br>recognition site                                               |            |
| pXMJ21                               | pXMJ 20 derivate, removing <i>lacIq</i> and (33)<br>$P_{lac}$ promoter and inserting <i>GFP</i>              |            |
| pXMJ- $P_{lac}$ -GFP                 | pXMJ21 derivate, $P_{lac}$ -GFP                                                                              | This study |
| pcstR- $P_{lac}$ -GFP                | pXMJ- $P_{lac}$ -GFP derivate, fused with<br><i>cstR</i> <sup>Sa</sup> - $P_{cstR}$ at the C-terminus of GFP | This study |
| pFisR- $P_{lac}$ -GFP                | pXMJ- $P_{lac}$ -GFP derivate, fused with<br><i>fisR</i> - $P_{FisR}$ at the C-terminus of GFP               | This study |
| pBigR- $P_{lac}$ -GFP                | pXMJ- $P_{lac}$ -GFP derivate, fused with<br><i>bigR</i> - $P_{BigR}$ at the C-terminus of GFP               | This study |
| PcstR <sup>E27G</sup>                | pcstR- $P_{lac}$ -GFP derivate, CstR mutation<br>site E27G                                                   | This study |
| PcstR <sup>S41G</sup>                | pcstR- $P_{lac}$ -GFP derivate, CstR mutation<br>site S41G                                                   | This study |
| PcstR <sup>V83A</sup>                | pcstR- $P_{lac}$ -GFP derivate, CstR mutation<br>site V83A                                                   | This study |
| PcstR <sup>E27G/S41G</sup>           | pcstR- $P_{lac}$ -GFP derivate, CstR mutation<br>site E27G/S41G                                              | This study |
| PcstR <sup>E27G/V83A</sup>           | pcstR- $P_{lac}$ -GFP derivate, CstR mutation<br>site E27G/V83A                                              | This study |
| PcstR <sup>S41G/V83A</sup>           | pcstR- $P_{lac}$ -GFP derivate, CstR mutation<br>site S41G/V83A                                              | This study |
| PcstR <sup>E27G/S41G/A64D</sup>      | pcstR- $P_{lac}$ -GFP derivate, CstR mutation<br>site E27G/S41G/A64D                                         | This study |
| PcstR <sup>E27G/S41G/I45T</sup>      | pcstR- $P_{lac}$ -GFP derivate, CstR mutation<br>site E27G/S41G/I45T                                         | This study |
| PcstR <sup>E27G/S41G/A64D/I45T</sup> | pcstR- $P_{lac}$ -GFP derivate, CstR mutation<br>site E27G/S41G/A64D/I45T                                    | This study |
| PcstR-P1                             | PcstR <sup>E27G/S41G/A64D</sup> derivate, E56 ( $P_{R1}$ )                                                   | This study |
| PcstR-P2                             | PcstR <sup>E27G/S41G/A64D</sup> derivate, G28 ( $P_{R2}$ )                                                   | This study |
| PcstR-P3                             | PcstR <sup>E27G/S41G/A64D</sup> derivate, K72 ( $P_{R3}$ )                                                   | This study |
| PcstR-sqr                            | PcstR-P3 derivate, fused with $P_{H7-sqr}^{Cp}$<br>at the N-terminus of GFP                                  | This study |
| PcstR-cstB                           | PcstR-sqr derivate, replacing <i>GFP</i> by<br><i>cstB</i>                                                   | This study |
| pXMJ-sqr <sup>Cp</sup>               | pXMJ 20 derivate, inserting <i>sqr</i> <sup>Cp</sup> at<br>MCS                                               | This study |
| pXMJ-sqr <sup>Ss</sup>               | pXMJ 20 derivate, inserting <i>sqr</i> <sup>Ss</sup> at<br>MCS                                               | This study |
| pXMJ-cstA                            | pXMJ 20 derivate, inserting <i>cstA</i> at MCS                                                               | This study |
| pXMJ-cstB                            | pXMJ 20 derivate, inserting <i>cstB</i> at MCS                                                               | This study |
| pXMJ-pdo                             | pXMJ 20 derivate, inserting <i>pdo</i> at MCS                                                                | This study |
| pXMJ-cg0964                          | pXMJ 20 derivate, inserting <i>cg0964</i> at                                                                 | This study |



|                |                                                                                             |            |
|----------------|---------------------------------------------------------------------------------------------|------------|
|                | MCS                                                                                         |            |
| pXMJ-cg1244    | pXMJ 20 derivate, inserting <i>cg1244</i> at MCS                                            | This study |
| pXMJ-cg2789    | pXMJ 20 derivate, inserting <i>cg2789</i> at MCS                                            | This study |
| pXMJ-cg3299    | pXMJ 20 derivate, inserting <i>cg3299</i> at MCS                                            | This study |
| pXMJ-cg3422    | pXMJ 20 derivate, inserting <i>cg3422</i> at MCS                                            | This study |
| pXMJ-cg3423    | pXMJ 20 derivate, inserting <i>cg3423</i> at MCS                                            | This study |
| pXMJ-Trx       | pXMJ 20 derivate, inserting <i>cg3299-3422-3423</i> at MCS                                  | This study |
| pXMJ-cysM      | pXMJ 20 derivate, inserting <i>cysM</i> at MCS                                              | This study |
| pXMJ-cysK      | pXMJ 20 derivate, inserting <i>cysK</i> at MCS                                              | This study |
| pXMJ-bcr       | pXMJ 20 derivate, inserting <i>bcr</i> at MCS                                               | This study |
| pXMJ-cstR-cysK | PcstR-cstB derivate, fused with <i>cysK</i> at the C-terminus of <i>cstB</i>                | This study |
| pXMJ-cys-C     | pXMJ 20 derivate, inserting <i>cysM-cg3299-3422-3423-cysK-bcr</i> at MCS                    | This study |
| pXMJ-cstR-cys  | PcstR-cstB derivate, fused with <i>cysK-bcr</i> at the C-terminus of <i>cstB</i>            | This study |
| <hr/>          |                                                                                             |            |
| pEC-XK99E      |                                                                                             |            |
| pEC-XK99E      | <i>Kan<sup>R</sup></i> , <i>C. glutamicum-E. coli</i> shuttle vector                        | Invitrogen |
| pEC-mCh1       | pEC-XK99E derivate, inserting mCherry before MCS                                            | This study |
| pEC-mCh2       | pEC-mCh1 derivate, replacing native promoter of <i>LacI</i> by the promoter P <sub>R3</sub> | This study |
| pEC-mCh3       | pEC-mCh2 derivate, replacing P <sub>trc</sub> of mCherry by the promoter P <sub>lac</sub>   | This study |
| pEC-mCh4       | pEC-mCh2 derivate, replacing P <sub>trc</sub> of mCherry by the promoter P <sub>tac</sub>   | This study |
| pEC-cys1       | pEC-mCh4 derivate, replacing mCherry by P <sub>R3-cysM-Trx</sub>                            | This study |
| pEC-cys2       | pEC-cys1 derivate, fused with DAS+8 tag at the N-terminus of <i>lacI</i>                    | This study |

**Table S3 Primers used in this study**

| Name                    | Sequence (5'-3')              |
|-------------------------|-------------------------------|
| Primers for the pCRD206 |                               |
| pCRD206-F               | tctagagtcgacctgcaggcatgcaagct |
| pCRD206-R               | ggatccccgggtaccgagctcgaattc   |

|              |                                                             |
|--------------|-------------------------------------------------------------|
| H7-serA-1F   | cgaattcgagctcggtagccgggatccgatcaaatcaataccgatcacctggaac     |
| H7-serA-1R   | gcagaatcaatagatcactcgagcaagttactcctggaaaaactagga            |
| H7-serA-2F   | tctagttttccaggagtaacttgctcgagtgatctattgattctgc              |
| H7-serA-2R   | ctaccggacggccattctggctcattatcttctttccagatcaatag             |
| H7-serA-3F   | ctattgatctggaaaggaagataatgagccagaatggccgtccggtag            |
| H7-serA-3R   | caagcttgcattgcctgcaggtcgactctagattagcgagccagatccatccacaca   |
| sdaA-serA-1F | acgaattcgagctcggtagccgggatccgtccaccactcgtccgtggcgatcaa      |
| sdaA-serA-1R | agaatcaatagatcactcgagcggctgaggggtgggcctttctatggtggtgtac     |
| sdaA-serA-2F | gaaaaggccaccctcagccgctcgagtgatctattgattctgcg                |
| sdaA-serA-2R | accggacggccattctggctcattatcttctttccagatcaatagagtt           |
| sdaA-serA-3F | gaaaggaagataatgagccagaatggccgtccggta                        |
| sdaA-serA-3R | cgtgttaaagccgtaccgctaattagcgagccagatccatccacac              |
| sdaA-serA-4F | gtgtggatggatctggctcgctaattagcggtagcggcttaacacg              |
| sdaA-serA-4R | aagcttgcattgcctcgaggtcgactctagaaggtgaatgccccctgtggtgatca    |
| serA-serA-1F | acgaattcgagctcggtagccgggatccgtccaccactcgtccgtggcgatcaa      |
| serA-serA-1R | agaatcaatagatcactcgagcggctgaggggtgggcctttctatggtggtgtac     |
| serA-serA-2F | gaaaaggccaccctcagccgctcgagtgatctattgattctgcg                |
| serA-serA-2R | accggacggccattctggctcattatcttctttccagatcaatagagtt           |
| serA-serA-3F | gaaaggaagataatgagccagaatggccgtccggta                        |
| serA-serA-3R | gccattctggctcatatgtatatcttctttattagcgagccagatccatccacac     |
| serA-serA-4F | tcgctaataagaaggagatatacatatgagccagaatggccgtccggtagt         |
| serA-serA-4R | cgtgttaaagccgtaccgctaattagcgagccagatccatccacac              |
| serA-serA-5F | gtgtggatggatctggctcgctaattagcggtagcggcttaacacg              |
| serA-serA-5R | aagcttgcattgcctcgaggtcgactctagaaggtgaatgccccctgtggtgatca    |
| H7-cysE-1F   | ttacgaattcgagctcggtagccgggatcccaaactccgtcaaggaccgtat        |
| H7-cysE-1R   | gaatcaatagatcactcgagcgcaggcaagttaacacgcgt                   |
| H7-cysE-2F   | acgctgttagactgcctgcctcgactcgagtgatctattgattc                |
| H7-cysE-2R   | ggatcattttattgtcgagagcattatcttctttccagatcaa                 |
| H7-cysE-3F   | ttgatctggaaaggaagataatgctctcgacaataaaaaatgatcc              |
| H7-cysE-3R   | aagcttgcattgcctcgaggtcgactctagaggtcgccgggttgatccccggctctggc |
| aecD-cysE-1F | tacgaattcgagctcggtagccgggatccctcagttgaaatgagccacgtacct      |
| aecD-cysE-1R | gaatcaatagatcactcgagccatctgcatagcttcttcaa                   |
| aecD-cysE-2F | ttgaaggaagctatggcagatggctcgagtgatctattgattc                 |
| aecD-cysE-2R | gacaatttccagttcttcacacgacattatcttctttccagatcaatagagt        |
| aecD-cysE-3F | actctattgatctggaaaggaagataatgtcgtgtgaagaactggaattgtc        |
| aecD-cysE-3R | tgccagcgaagtccaaccacatcttagatcccatccccatactcaa              |
| aecD-cysE-4F | ttgagtatggggatgggatctaagatgtggttgacttcgctggca               |
| aecD-cysE-4R | aagcttgcattgcctcgaggtcgactctagataatcactggagccgcaacggccaaca  |
| cysE-cysE-1F | tacgaattcgagctcggtagccgggatccctcagttgaaatgagccacgtacct      |
| cysE-cysE-1R | gaatcaatagatcactcgagccatctgcatagcttcttcaa                   |
| cysE-cysE-2F | ttgaaggaagctatggcagatggctcgagtgatctattgattc                 |
| cysE-cysE-2R | gacaatttccagttcttcacacgacattatcttctttccagatcaatagagt        |
| cysE-cysE-3F | actctattgatctggaaaggaagataatgtcgtgtgaagaactggaattgtc        |
| cysE-cysE-3R | cacacgacatatgtatatcttctttattagatcccatccccatactcaa           |

cysE-cysE-4F tatggggatgggatctaataagaaggagatatacatatgctggtggaagaactggaa  
cysE-cysE-4R tgccagcgaagtccaaccacatcttagatcccatcccatactcaa  
cysE-cysE-5F ttgagtatggggatgggatctaagatgtggttgacttcgctggca  
cysE-cysE-5R aagcttgcagctgcaggtcgactctagataatcactggagccgcaacggccaaca  
glyR-cysE-1F acgaattcgagctcggtagccggggatccaacaacgccaccggcaaggatctcatc  
glyR-cysE-1R tcactcgagcggatgggataacggaggtcattcact  
glyR-cysE-2F tccggtatcccacgctcgagtgatctattgattct  
glyR-cysE-2R acaatttcagttctcacacgacattatcttcttccagatcaatagag  
glyR-cysE-3F ctctattgatctggaaaggaagataatgctggtggaagaactggaaattgt  
glyR-cysE-3R gcattgttcacggtgaccaaatttagatcccatcccatactcaa  
glyR-cysE-4F ttgagtatggggatgggatctaataatttggtcaaccgtgaacaatgc  
glyR-cysE-4R caagcttgcagctgcaggtcgactctagatggatttccgatcaacgcagaa  
glyR-cysM-1F acgaattcgagctcggtagccggggatccaacaacgccaccggcaaggatctcatc  
glyR-cysM-1R tcactcgagcggatgggataacggaggtcattcact  
glyR-cysM-2F tccggtatcccacgctcgagtgatctattgattct  
glyR-cysM-2R gttctaattgtactcattatcttcttccagatcaatagagtt  
glyR-cysM-3F gatctggaaaggaagataatgagtacattagaacaacaatagggc  
glyR-cysM-3R ttcacggtgaccaaattattaaatccccgccccctggctaa  
glyR-cysM-4F ggatttaataatttggtcaaccgtgaacaatgc  
glyR-cysM-4R caagcttgcagctgcaggtcgactctagatggatttccgatcaacgcagaa  
H7-cysK-1F ttacgaattcgagctcggtagccggggatccggaatgaaggccctcatcctgaat  
H7-cysK-1R gaatcaatagatcactcgagcgtcgggtggtgctccaatca  
H7-cysK-2F tgattggagcaccaccgacgctcgagtgatctattgattc  
H7-cysK-2R ttggtgtacacattgccattatcttcttccagatcaa  
H7-cysK-3F ttgatctggaaaggaagataatgggcaatgtgtacaaca  
H7-cysK-3R aagcttgcagctgcaggtcgactctagattagtcgaggatgtcttctg  
poxB-cysK-1F tacgaattcgagctcggtagccggggatccagttggagcaaacgcagcaccaag  
poxB-cysK-1R atcaatagatcactcgagcgaatcataaagaccctgaatcaggtgtgt  
poxB-cysK-2F acacacctgattcaggtctttatgattcgctcgagtgatctattgat  
poxB-cysK-2R gagttatctcaaaaacttactcattatcttcttccagatcaatagag  
poxB-cysK-3F ctctattgatctggaaaggaagataatgagtaagattttgaagataact  
poxB-cysK-3R gcagccgccgaatctctcgaaattcactttactgttgcaattcttctcagt  
poxB-cysK-4F actgagaaagaattgcaacagtaaagtgaatttcgagagattgcccgggctgc  
poxB-cysK-4R caagcttgcagctgcaggtcgactctagagccatcaatccatgctggtttatcag  
cysK-cysK-1F tacgaattcgagctcggtagccggggatccagttggagcaaacgcagcaccaag  
cysK-cysK-1R atcaatagatcactcgagcgaatcataaagaccctgaatcaggtgtgt  
cysK-cysK-2F acacacctgattcaggtctttatgattcgctcgagtgatctattgat  
cysK-cysK-2R gagttatctcaaaaacttactcattatcttcttccagatcaatagag  
cysK-cysK-3F ctctattgatctggaaaggaagataatgagtaagattttgaagataact  
cysK-cysK-3R aatcttactcatatgtatatcttcttattactgttgcaattcttctcagt  
cysK-cysK-4F tgcaacagtaataagaaggagatatacatatgagtaagattttgaagata  
cysK-cysK-4R gcagccgccgaatctctcgaaattcactttactgttgcaattcttctcagt  
cysK-cysK-5F actgagaaagaattgcaacagtaaagtgaatttcgagagattgcccgggctgc  
cysK-cysK-5R caagcttgcagctgcaggtcgactctagagccatcaatccatgctggtttatcag

|                 |                                                            |
|-----------------|------------------------------------------------------------|
| ldh-eamA-1F     | acgaattcgagctcgggtaccggggtaccttcatacaccacgggctaccggaacg    |
| ldh-eamA-1R     | gaatcaatagatcactcagcttccgatcccacttctctgat                  |
| ldh-eamA-2F     | atcaggaagtgggatcgaagctcagtgatctattgattc                    |
| ldh-eamA-2R     | aacaccccatctttcgcgacattatcttctttccagatcaat                 |
| ldh-eamA-3F     | attgatctggaaaggagataatgtcgcgaaaagatgggggtgt                |
| ldh-eamA-3R     | gtcgcceaactaggcgccaaagatttaactcccacctttaccgcttt            |
| ldh-eamA-4F     | aaagcggtaaaggtgggaagttaaatctttggcgcctagttggcgac            |
| ldh-eamA-4R     | aagcttgcattgcctgcaggtcactctagaaaaacctggtcacgggtgaatgctcggc |
| NCgl2463-1F     | ttacgaattcgagctcgggtaccggggatcccagaccatcggcgatatcga        |
| NCgl2463-1R     | gtcccatgtcgtattggctcgcagcgcgctaagaagacc                    |
| NCgl2463-2F     | ggctcttagcggcgtcagccaatcatcgacatggggac                     |
| NCgl2463-2R     | aagcttgcattgcctgcaggtcactctagatgacacggccattcaccaccgtaac    |
| tac-cysU-1F     | gaattcgagctcgggtaccggggtacaaacaaggagcgttaattcca            |
| tac-cysU-1R     | tgacgccagaagcattgggtcacagcaaaaataggccaatgatca              |
| tac-cysU-2F     | tgatcattggacctatcttctgtgtgcaccaatgcttctggcgta              |
| tac-cysU-2R     | ccaggggatctgcaacagcaaatgtatatctccttcttaaga                 |
| tac-cysU-3F     | tcttaagaaggagatatacatttctgttgcagatcccctgg                  |
| tac-cysU-3R     | agcttgcattgcctgcaggtcactctagagtgttttaggaaggcgcgcaccctcat   |
| H7-zwf-1F       | attacgaattcgagctcgggtaccggggtaccagagctcaaggccgctggcgcatc   |
| H7-zwf-1R       | cgcagaatcaatagatcactcagcagtggtagtgtcacgatcctttct           |
| H7-zwf-2F       | aagaaaggatcgtgacactaccatcgtcagtgatctattgattctgcg           |
| H7-zwf-2R       | tggagggggtcgtgtttgtgtcactatcttctttccagatcaatag             |
| H7-zwf-3F       | ctattgatctgaaaggaagatagtgagcacaacacgaccccctcca             |
| H7-zwf-3R       | gccaagcttgcattgcctgcaggtcactctagagtacaagccgcaaaagtctcagt   |
| pck-H7-pntAB-1F | ttacgaattcgagctcgggtaccggggtaccgatcactggcttagacctt         |
| pck-H7-pntAB-1R | gcagaatcaatagatcactcagcggcttttctcgttgagcttgatg             |
| pck-H7-pntAB-2F | catcaagctcaacgaggaaaagcggctcagtgatctattgattctgc            |
| pck-H7-pntAB-2R | gttctcttggtatgccaattcgcattatcttctttccagatcaatagag          |
| pck-H7-pntAB-3F | ctctattgatctggaaaggaagataatgcgaattggcataccaagagaac         |
| pck-H7-pntAB-3R | agacatatgtatatctccttcttattaattttgcggaacattttcagc           |
| pck-H7-pntAB-4F | aattaataagaaggagatatacatatgtctggaggattagttacagct           |
| pck-H7-pntAB-4R | gcattctgtcggacccttgttacagagctttcaggattgc                   |
| pck-H7-pntAB-5F | gcaatcctgaaagctctgtaacaagggtggcgacaagatgc                  |
| pck-H7-pntAB-5R | aagcttgcattgcctgcaggtcactctagaatacgaacaaacccgacctgacat     |

---

Primers for the pXMJ19

|              |                                                      |
|--------------|------------------------------------------------------|
| pXMJ-F       | atggcgatgagtaaaggagaagaactt                          |
| pXMJ-R       | tacgacgataccgaagacagctcatgtt                         |
| lacI-GFP-F   | catgagctgtcttcgggtatcgtcgtatatatggcgagcgcgaatgaccatt |
| lacI-GFP-R   | aagttcttctcttactcactcgcacatattcaccacctgaattgactctct  |
| lacI-BigR-1F | catgagctgtcttcgggtatcgtcgtatatatggcgagcgcgaatgaccatt |
| lacI-BigR-1R | tccagegcgttttctttaccatattcaccacctgaattgac            |
| lacI-BigR-2F | gtcaattcagggtggtgaatatggtaaaggaaaacgcgctgga          |
| lacI-BigR-2R | aagttcttctcttactcactcgcacatctgggaaagcgtcggctggcggat  |
| lacI-BigR-3F | atccgccagccgacgctttccagatggcgatgagtaaaggagaagaactt   |

|                          |                                                                                                                                  |
|--------------------------|----------------------------------------------------------------------------------------------------------------------------------|
| lacI-BigR-3R             | atggtcattgcgctcgccatataacgacgataaccgaagacagctcatg                                                                                |
| lacI-FisR-1F             | catgagctgtcttcggtatcgtcgtatataatggcgagcgcaatgaccatt                                                                              |
| lacI-FisR-1R             | cttgaagtgtggctttacgatccatattcaccacctgaattgact                                                                                    |
| lacI-FisR-2F             | agtcaattcagggtggtgaatatggatcgtaaagccacacttcaag                                                                                   |
| lacI-FisR-2R             | aagttcttctcttactcatcgccatttgcgaggggcttggcatggtcgggtg                                                                             |
| lacI-FisR-3F             | acaccgacctgccaagcccctcgcaaatggcgatgagtaaaggagaagaactt                                                                            |
| lacI-FisR-3R             | atggtcattgcgctcgccatataacgacgataaccgaagacagctcatg                                                                                |
| lacI-cstR-1F             | catgagctgtcttcggtatcgtcgtatataatggcgagcgcaatgaccatt                                                                              |
| lacI-cstR-1R             | atcttcttgcgtagtgcataattcaccacctgaattgac                                                                                          |
| lacI-cstR-2F             | gtcaattcagggtggtgaatatgcactacgacaagaagat                                                                                         |
| lacI-cstR-2R             | aagttcttctcttactcatcgccataataacctctgttaaata                                                                                      |
| lacI-cstR-3F             | tatttaacaggagggttattatggcgatgagtaaaggagaagaactt                                                                                  |
| lacI-cstR-3R             | atggtcattgcgctcgccatataacgacgataaccgaagacagctcatg                                                                                |
| Er-PestR-1F              | taaagttatttctccactttaattga                                                                                                       |
| Er-PestR-1R              | catattcaccacctgaattgactctcttc                                                                                                    |
| Er-PestR-2F              | gaagagagtcaattcagggtggtgaatatg                                                                                                   |
| Er-PestR-2R              | tcaattaaaagtggaggaaataacttta                                                                                                     |
| PcstR <sup>E27G</sup> -F | tcatcaaatgatggaaggggaaaaggattgcaa                                                                                                |
| PcstR <sup>E27G</sup> -R | ttgcaatcctttccccttccatcattttgatga                                                                                                |
| PcstR <sup>S41G</sup> -F | accgatctcagcaggcaaaagtt                                                                                                          |
| PcstR <sup>S41G</sup> -R | aacttttgcctgctgagatctgggt                                                                                                        |
| PcstR <sup>V83A</sup> -F | aagttcgactcagcgcctcatgggcatc                                                                                                     |
| PcstR <sup>V83A</sup> -R | gatgccatgaggcgtgagtcgaactt                                                                                                       |
| PcstR <sup>A64D</sup> -F | gtgtgtgaaaactgacgaagacaacgggtg                                                                                                   |
| PcstR <sup>A64D</sup> -R | caccgttctctcgtcagttttcacacac                                                                                                     |
| PcstR <sup>I45T</sup> -F | tgtaacctgctggctaagtccaagtaa                                                                                                      |
| PcstR <sup>I45T</sup> -R | ttacttggacttagccagcaggttgaca                                                                                                     |
| Ro-PcstR-F               | ccaggctcacgtannnnnnnnnnnnnnnnnnnnnnnnnnnnnnnncnnnnnnnn<br>nnnnnnnnnnnnntanantnnnnnnnnnnnnnaaggannnnnatgcactacg<br>acaagaagatgatc |
| Ro-PcstR-R               | ccaggctcatacagcagataaccgaagacagctca                                                                                              |
| PcstR-P1-F               | tgagctgtcttcggtatcgtcgtactttaatttggattcacgg                                                                                      |
| PcstR-P1-R               | catcttcttgcgtagtgcattgttgtgtctctctaaagattgt                                                                                      |
| PcstR-P2-F               | gagctgtcttcggtatcgtcgtagcgtgcagtaggcgcgtagggtaa                                                                                  |
| PcstR-P2-R               | catcttcttgcgtagtgcattgtatgtcctcctggacttctgggtg                                                                                   |
| PcstR-P3-F               | tgagctgtcttcggtatcgtcgtagctcgagtgatctattgatc                                                                                     |
| PcstR-P3-R               | tcttcttgcgtagtgcattatcttcttccagatcaatagagt                                                                                       |
| PcstR-sqr-1F             | ttgccacccagagcttcaaggctaaggctgttttggcggatgagagaagatt                                                                             |
| PcstR-sqr-1R             | gaatcaatagatcactcgagcctatttgtatagttcatccat                                                                                       |
| PcstR-sqr-2F             | atggatgaactatacaaataggctcgagtgatctattgatc                                                                                        |
| PcstR-sqr-2R             | ggttagtgcacgaggctgcattatcttcttccagatcaa                                                                                          |
| PcstR-sqr-3F             | ttgatctggaaaggaagataatgcagcctcgtgcactaacc                                                                                        |
| PcstR-sqr-3R             | aatcttctctatccgcaaacagccttagccttgaagctctgggggtggcaa                                                                              |
| PcstR-cstB-1F            | ttataggtatttaacaggagggttattatgttcttcaagcagttctacgac                                                                              |

|                           |                                                         |
|---------------------------|---------------------------------------------------------|
| PcstR-cstB-1R             | cagaatcaatagatcactcgcagcttacttcaggctttcgggaaatcct       |
| PcstR-cstB-2F             | atccccgaaagcctgaagtaagctcgcagtgatctattgattctg           |
| PcstR-cstB-2R             | gtcgtagaactgcttgaagaacataataacctcctgttaaatacctataagg    |
| pXMJ-cstR-cys-1F          | aggtathtaacaggagggttattAtgaccaccgcagcattcgtcgc          |
| pXMJ-cstR-cys-1R          | cttgaagaacatatgtatatctccttcttaccgctttttcggccgactggcgtag |
| pXMJ-cstR-cys-2F          | aacgggtgataagaaggagatatacatatgttcttcaagcagttctacgac     |
| pXMJ-cstR-cys-2R          | cgacgaatgctgtcgggtgtcaTaataacctcctgttaaatacctat         |
| pXMJ-sqr <sup>CP</sup> -F | ttgatctggaaaggaagataatgcagcctcgtgcactaaccaac            |
| pXMJ-sqr <sup>CP</sup> -R | cttctctatccgcaaaaacagccttagccttgaagctctgggggtggca       |
| pXMJ-sqr <sup>Ss</sup> -F | tgatctggaaaggaagataatggctcatattgttgaatcggg              |
| pXMJ-sqr <sup>Ss</sup> -R | tctcatccgcaaaaacagccttagtctggaggaaggggacgcacaagct       |
| pXMJ-cstA-F               | tattgatctggaaaggaagataatgaagcagtagcggcgagaagtca         |
| pXMJ-cstA-R               | ctcatccgcaaaaacagccttaataaacagggtgtggttggcggt           |
| pXMJ-cstB-F               | gatctggaaaggaagataatgttctcaagcagttctacgac               |
| pXMJ-cstB-R               | atccgcaaaaacagccttacttcaggctttcgggaaatcctggta           |
| pXMJ-pdo-F                | ctggaaaggaagataatgactcccaccatgcctagccctt                |
| pXMJ-pdo-R                | catccgcaaaaacagccttagagagcatttaaggaatcttcaggtag         |
| pXMJ-cg0964-F             | ctggaaaggaagataatgagcaacgtaaccatttacgcc                 |
| pXMJ-cg0964-R             | catccgcaaaaacagccttaggctaagcttcgattttggcg               |
| pXMJ-cg1244-F             | ctggaaaggaagataatgaaagtcacgattttccataatc                |
| pXMJ-cg1244-R             | tccgcaaaaacagcctcacaagatgctgtcaatgacgtc                 |
| pXMJ-cg2789-F             | attgatctggaaaggaagataatggcaatcaccgtttacaccaagccagcttgcg |
| pXMJ-cg2789-R             | catccgcaaaaacagccttaggcagctgcgggtgccatttcacgga          |
| pXMJ-cg3299-F             | tgaaaggaagataatggcaaccatcgatgtaaccgaagaacat             |
| pXMJ-cg3299-R             | ctctcatccgcaaaaacagccttatgcctctgcagaaccctgctgctc        |
| pXMJ-cg3422-F             | tattgatctggaaaggaagataatgtctgaagaacaatctgccgtagcac      |
| pXMJ-cg3422-R             | atccgcaaaaacagccttaggccagagaagctaggtaatgct              |
| pXMJ-cg3423-F             | ctggaaaggaagataatgagcaatgttgtgcagtaaccgagcag            |
| pXMJ-cg3423-R             | catccgcaaaaacagccttagagggtcttctctagttttccaca            |
| pXMJ-Trx-1F               | tgatctggaaaggaagatattggcaaccatcgatgtaaccg               |
| pXMJ-Trx-1R               | agacatatgtatatctccttcttattatgcctctgcagaaccctgctgc       |
| pXMJ-Trx-2F               | gcataataagaaggagatatacatatgtctgaagaacaatctgccgtagc      |
| pXMJ-Trx-2R               | ttgctcatatgtatatctccttcttattaggccagagaagctaggtaatg      |
| pXMJ-Trx-3F               | cctaataagaaggagatatacatatgagcaatgttgtgcagtaaccga        |
| pXMJ-Trx-3R               | tctcatccgcaaaaacagccttagagggtcttctctagttttccacaa        |
| pXMJ-cysM-F               | tgatctggaaaggaagataatgagtacattagaacaacaataggc           |
| pXMJ-cysM-R               | ctcatccgcaaaaacagccttaaatccccccccctggctaa               |
| pXMJ-cysK-F               | attgatctggaaaggaagataatgagtaagattttgaagataact           |
| pXMJ-cysK-R               | cttctctatccgcaaaaacagccttactgttgaattcttctcagt           |
| pXMJ-ber-F                | tgatctggaaaggaagataatgaccaccgcagcattcgtcgtt             |
| pXMJ-ber-R                | cttctctatccgcaaaaacagcctcaccgctttttcggccgactggcg        |
| pXMJ-cys-C-1F             | cagtcggccgaaaaaacgggtgaggctgtttggcgatgagagaaga          |
| pXMJ-cys-C-1R             | ttgtttgttctaattgtactcatatcttcttccagatcaatagagt          |
| pXMJ-cys-C-2F             | actctattgatctggaaaggaagataatgagtacattagaacaacaa         |

|                  |                                                    |
|------------------|----------------------------------------------------|
| pXMJ-cys-C-2R    | ctcatatgtatatctccttctactagaggtgcttctctagttttccaca  |
| pXMJ-cys-C-3F    | tctagtaagaaggagatatacatatgagtaagatTTTTgaagataact   |
| pXMJ-cys-C-3R    | cttctctcatccgcaaaacagcctcaccgTTTTcggccgactggcgta   |
| pXMJ-cstR-cys-1F | acggtgataagaaggagatatacatatgttcttcaagcagttctacgaca |
| pXMJ-cstR-cys-1R | agttatctcaaaaatcttactcataataacctcctgttaaatactata   |
| pXMJ-cstR-cys-2F | tataggtatttaacaggagggtattatgagtaagatTTTTgaagataact |
| pXMJ-cstR-cys-2R | gaacatatgtatatctccttctatcaccgTTTTcggccgactggc      |

---

Primers for the pEC-XK99E

---

|             |                                                              |
|-------------|--------------------------------------------------------------|
| pEC-mCh1-1F | ttcacacaggaacagaccatgatggtgagcaagggcgaggaggac                |
| pEC-mCh1-1R | gatccccgggtaccgagctcgaattcttagccggcctgtacagctcgt             |
| pEC-mCh1-2F | acgagctgtacaaggccggctaagaattcgagctcggtagccggggatc            |
| pEC-mCh1-2R | gtcctcctcgcccttctcaccatcatggctctgttctctgtgtgaa               |
| pEC-mCh2-1F | aattcagggtggtgaatagtatttctccactttaattgaataaagtca             |
| pEC-mCh2-1R | ataacgttactggtttcacaataacctcctgttaaatactataagg               |
| pEC-mCh2-2F | ttaacaggagggtattgtgaaaccagtaacgttatacgatg                    |
| pEC-mCh2-2R | attcaattaaaagtggaggaaataactattcaccacctgaattgactctct          |
| pEC-mCh3-1F | ctggcgtcaggcagccatcggaagctatatggcgagcgcaatgaccatt            |
| pEC-mCh3-1R | gtcctcctcgcccttctcaccatattcaccacctgaattgactctc               |
| pEC-mCh3-2F | gagagtcaattcagggtggtgaatagtgtgagcaagggcgaggaggac             |
| pEC-mCh3-2R | tcaatggtcattgcgctcggcatatagcttccgatggctgctgacgccaga          |
| pEC-mCh4-1F | aggcagccatcggaagctgtggtgtgcaccaatgcttctggcgtca               |
| pEC-mCh4-1R | gttgcctcctcgcccttctcaccatattgtatatctccttcttaaagaagct         |
| pEC-mCh4-2F | agcttctttaagaaggagatatacatatggtgagcaagggcgaggaggacaac        |
| pEC-mCh4-2R | tgacgccagaagcattggtgcacaccacagcttccgatggctgcct               |
| pEC-cys1-1F | gtggaaaaactagagaagcacctctaggaattcgagctcggtagccgggatcc        |
| pEC-cys1-1R | tattgtttgttctaattgtactcataataacctcctgttaaatacctat            |
| pEC-cys1-2F | ataggtatttaacaggagggtattatgagtacattagaacaacaata              |
| pEC-cys1-2R | ggatccccgggtaccgagctcgaattcctagaggtgcttctctagttttccac        |
| pEC-cys2-F  | ctacgctgatgcttctaagctgcaaacgacgaaaactacaactacgctgatgcttct    |
|             | aagcgaacgcaattaatgtgagttag                                   |
| pEC-cys2-R  | gtagtttctgctgttgacgcttaggaagcatcagcgtagtttctgctgttgacgctgccc |
|             | cgcttccagtcgggaaacctgt                                       |

---

Primers for the RT-qPCR

---

|        |                       |
|--------|-----------------------|
| cysD-F | aagtccaggactggatcgat  |
| cysD-R | gcttcagtcagttggagat   |
| cysN-F | atcaccatcgacgttgcccta |
| cysN-R | ctgtgacatcaagtgcagat  |
| cysH-F | catgctgctgcgttgatga   |
| cysH-R | cttgaagtggtaaccgggtg  |
| cysI-F | ccattgcaccggatgacatt  |
| cysI-R | tacgaatccagtgacgctga  |
| cysJ-F | acgcatcaagggcatcgta   |
| cysJ-R | gtcgtagaagccaacgaact  |
| cysK-F | aactcgtgactatcggtca   |



|          |                      |
|----------|----------------------|
| cysK-R   | gctacataggccagtgcaat |
| cysM-F   | ctggtgaagttgcagegaat |
| cysM-R   | tgttgtcgggcatcagcaat |
| cg3299-F | aaccatcgatgtaaccgaa  |
| cg3299-R | catcagagttgggatggact |
| cg3422-F | tggctataccgcagcagtat |
| cg3422-R | gacaagctccatgtgcatgt |
| cg3423-F | caagccagtcacgttgact  |
| cg3423-R | gaccgacaaattcctcgact |
| metB-F   | atgagccagacgactactac |
| metB-R   | gatgatgcggaacaggatgt |
| metH-F   | cctgatgtgttgaggcagat |
| metH-R   | gcaacgatcagcagatgcat |
| metE-F   | gcgaagcgtgaactgaagtt |
| metE-R   | atcgagcattgcgtcgtagt |
| metK-F   | accagcgcttacgtagagat |
| metK-R   | actgctcaccgatggatact |
| metY-F   | caattcaatgctgaccagt  |
| metY-R   | ctagatcctcaagtgcgaa  |
| 16S-F    | acctggagaagaagcaccg  |
| 16S-R    | tcaagttatgcccgatcg   |

---
